# Supplementary material for: Patient-powered research networks: building capacity for conducting patient-centered clinical outcomes research
Source: PubMed Central journal article supplement — J Am Med Inform Assoc. 2014 May 12;21(4):583–6. doi: 10.1136/amiajnl-2014-002758 (PMC4078295; doi:10.1136/amiajnl-2014-002758), 2014-05-12
Supplement: amiajnl-2014-002758-s1.pdf [file amiajnl-2014-002758-s1.pdf]

Supplemental File: Hyperlinks to PCORnet PPRN network abstracts

| Network*                                                                                                           | Principal Investigator                            |
|--------------------------------------------------------------------------------------------------------------------|---------------------------------------------------|
| <a href="#">ALD Connect</a>                                                                                        | Florian Eichler                                   |
| <a href="#">American BRCA Outcomes and Utilization of Testing Patient-Powered Research Network (ABOUT Network)</a> | Rebecca Sutphen                                   |
| <a href="#">Arthritis Patient Partnership with Comparative Effectiveness Researchers (AR-poWER PPRN)</a>           | Seth Ginsberg                                     |
| <a href="#">CCFA Partners Patient Powered Research Network</a>                                                     | R.Balfour Sartor / Michael Kappelman              |
| <a href="#">Community Engaged Network for All (CENA)</a>                                                           | Sharon Terry                                      |
| <a href="#">ImproveCareNow: A Learning Health System for Children with Crohn's Disease or Ulcerative Colitis</a>   | Peter Margolis                                    |
| <a href="#">Mood Patient-Powered Research Network</a>                                                              | Andrew Nierenberg                                 |
| <a href="#">Multiple Sclerosis Patient Powered Research Network</a>                                                | Robert McBurney                                   |
| <a href="#">NephCure Kidney Network for Patients with Nephrotic Syndrome</a>                                       | Bruce Robinson                                    |
| <a href="#">Patient Research Connection: PI-Connect</a>                                                            | Kathleen Sullivan                                 |
| <a href="#">Patients, Advocates and Rheumatology Teams Network for Research and Service (PARTNERS) Consortium</a>  | Laura Schanberg / Esi Morgan Dewitt / Marc Natter |
| <a href="#">Phelan-McDermid Syndrome Data Network</a>                                                              | Megan O'Boyle / Lyz Horn / Paul Avillach          |
| <a href="#">Rare Epilepsy Network (REN)</a>                                                                        | Janice Buelow                                     |
| <a href="#">Sleep-Apnea-Patient Centered OutcomesNetwork (SA-PCON)</a>                                             | Susan Redline                                     |
| <a href="#">The COPD Patient Powered Research Network</a>                                                          | John Walsh/ Richard Mularski                      |
| <a href="#">The DuchenneConnect Patient-Report Registry Infrastructure Project</a>                                 | Holly Peay                                        |
| <a href="#">The Health eHeart Alliance</a>                                                                         | Mark Pletcher                                     |
| <a href="#">The Vasculitis Patient Powered Research Network</a>                                                    | Peter Merkel                                      |
